# Supplementary material for: Age-dependent Pdgfrβ signaling drives adipocyte progenitor dysfunction to alter the beige adipogenic niche in male mice
Source: PubMed Central journal article supplement (PMC10066302; doi:10.1038/s41467-023-37386-z), 2023-03-31
Supplement: 41467_2023_37386_MOESM1_ESM.pdf [file 41467_2023_37386_MOESM1_ESM.pdf]

# Supplementary Figure 1

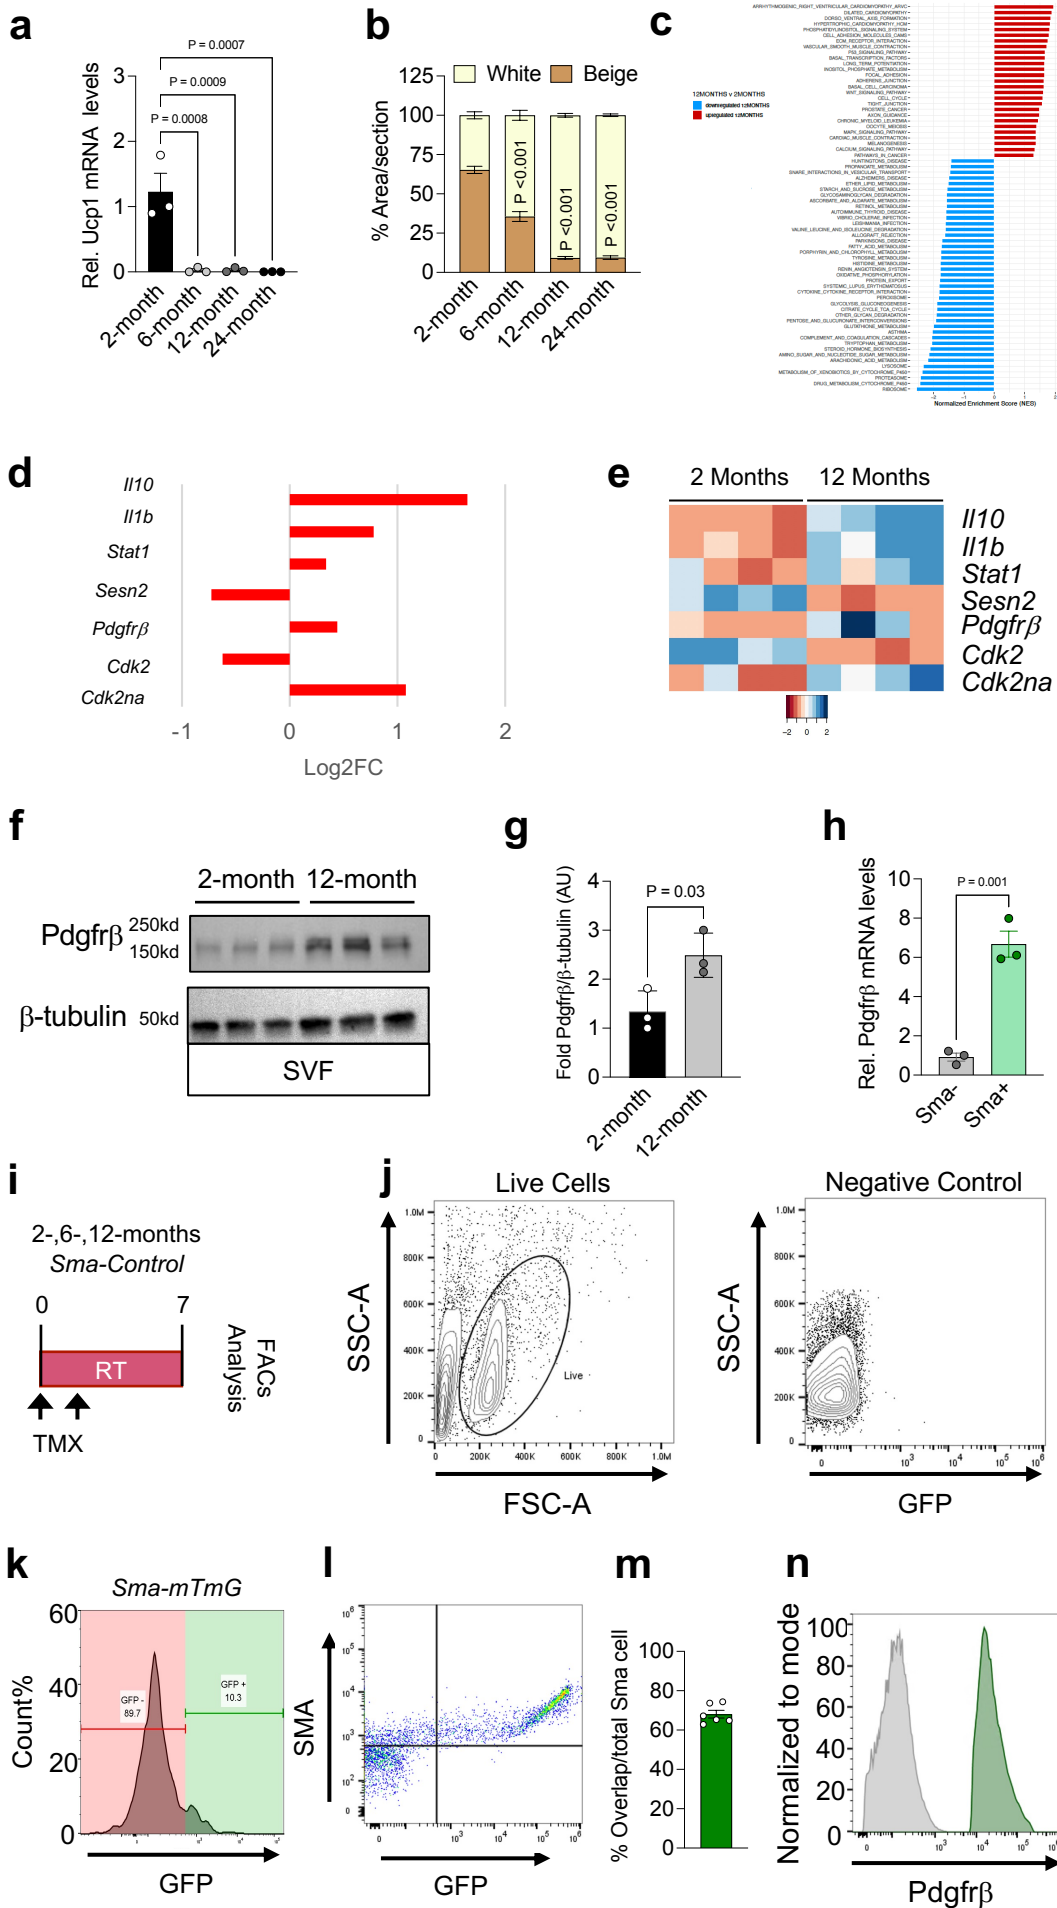

**Supplementary Figure 1. Ageing promotes beige adipogenic failure and is associated with elevated levels of Pdgfr $\beta$  a**, Ucp1 mRNA expression within dorsolumbar iWAT depots from two-, six-, twelve-, and twenty-four-month-old cold exposed (seven-days) male mice ( $n = 3$  biologically independent mice/group examined over 2 experiments). **b**, Image quantification of Ucp1 immunofluorescence, identifying beige fat area within dorsolumbar iWAT sections from two-, six-, twelve-, and twenty-four-month-old cold exposed male mice ( $n = 3$  biologically independent mice/group with 3 images per mouse quantified). **c-e**, Gene ontology and pathway analysis (**c**), gene enrichment (**d**), and heat map (**e**) of differential and senescence/ageing genes within the iWAT SVF of two- and twelve-month old male mice ( $n = 4$  mice/group). **f**, Immunoblot of Pdgfr $\beta$  expression within the SVF of iWAT depots from two- and twelve-month-old male mice ( $n = 3$  mice/group). **g**, Quantification of the immunoblot described in (**f**). **h**, Sma (-) and Sma (+) cells were FACS isolated from iWAT depots from *Sma-Cre<sup>ERT2</sup>; R26<sup>mGFP</sup>* mice. Pdgfr $\beta$  mRNA expression was assessed ( $n = 3$  mice/group). **i**, Experimental schema: Sma-Control(<sup>mGFP</sup>) mice were administered one dose of tamoxifen for two consecutive days; subsequently, the SVF was isolated and Sma-mGFP+ cells were sort-purified. **j**, Representative flow cytometry plots demonstrating live cell and negative control gating strategies. **k, l**, Representative FACS histogram (**k**) and profile (**l**) of iWAT SV cells isolated from TMX pulsed Sma-Control mice. Similar plots were used to collect and identify Sma-mGFP+ cells under various conditions. **m**, Quantification of FACS analyzed Sma-mGFP colocalized with endogenous Sma over total antibody identified Sma expression within the SVF of iWAT depots from plots described in (**i**) ( $n = 6$  biologically independent mice/group). **n**, Representative FACS histogram of Pdgfr $\beta$  expression within Sma+ beige APCs from two- (grey) and twelve-month (green) old male mice ( $n = 3$  mice/group). Data are presented as mean values  $\pm$  SEM. Data was analyzed by two-tailed Student's *t*-test. Source data are provided within the Source Data file. The full list of genes and normalized counts for the gene expression analysis can be found in Supplementary Data 1 and 2.

# Supplementary Figure 2

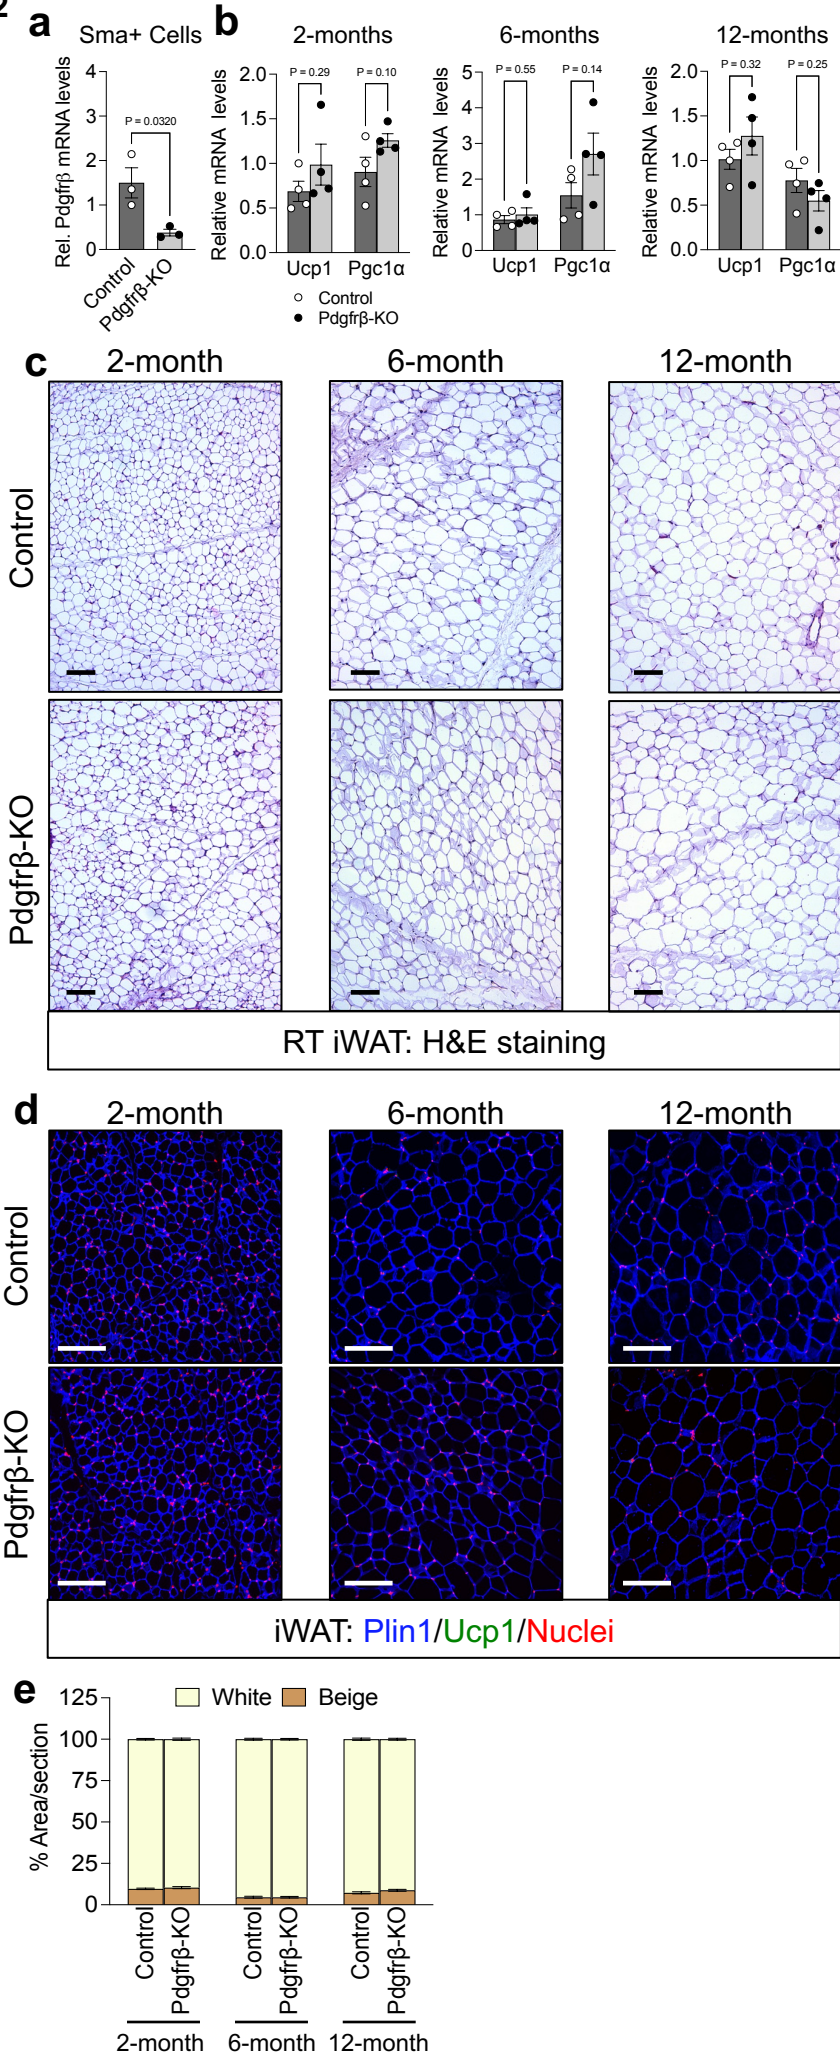

**Supplementary Figure 2: Phenotypic analysis of room temperature Sma-Pdgfr $\beta$ -KO mice. a,** Pdgfr $\beta$  mRNA expression within FACS isolated Sma<sup>+</sup> cells from Sma-Control and Sma-Pdgfr $\beta$ -KO mice ( $n = 3$  or  $4$  biologically independent mice/group examined over  $2$  experiments). **b,** Two-, six-, and twelve-month-old Sma-Control and Sma-Pdgfr $\beta$ -KO were administered one dose of TMX for two consecutive days. Dorsolumbar iWAT depots from mice maintained at RT were examined for Ucp1 and Pgc1 $\alpha$  gene expression ( $n = 4$  biologically independent mice/group examined over  $2$  experiments). **c,** Representative images of H&E staining of the dorsolumbar iWAT depot from mice described in **(b)** (x10 magnification, scale bar  $100 \mu\text{m}$ ). **d,** Representative images of Plin1 (blue) and Ucp1 (green) immunostaining of dorsolumbar iWAT depots from mice described in **(b)** (x20 magnification, scale bar  $100 \mu\text{m}$ ). **e,** Beige adipocyte quantification within dorsolumbar iWAT sections from RT maintained two-, six-, and twelve-month-old Sma-Control and Sma-Pdgfr $\beta$ -KO mice ( $n = 3$  images/mouse;  $3$  mice/group) as described in **(b)**. Data are presented as mean values  $\pm$  SEM. Data was analyzed by two-tailed Student's  $t$ -test. Source data are provided within the Source Data file.



# Supplementary Figure 3

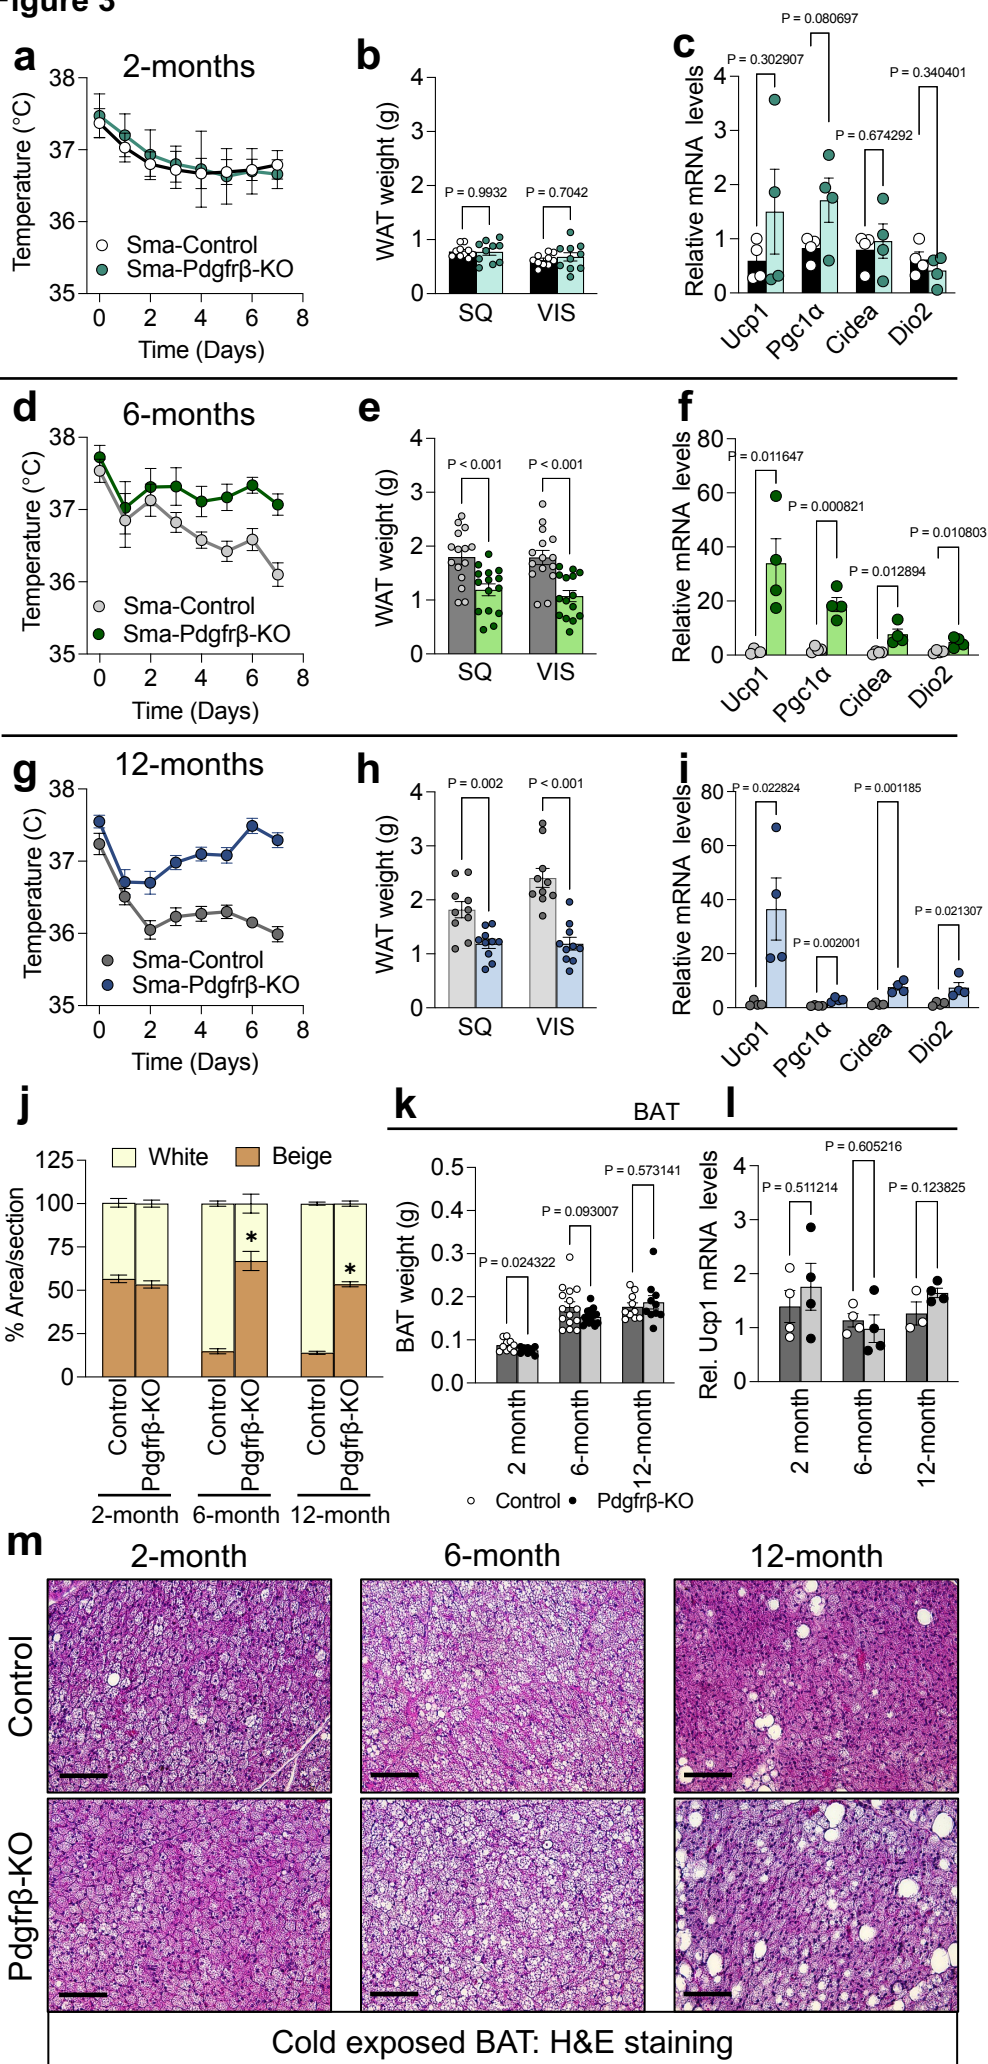

**Supplementary Figure 3: Phenotypic analysis of cold-exposed Sma-Pdgfr $\beta$ -KO mice.** **a-c**, Two-month-old Sma-Control and Sma-Pdgfr $\beta$ -KO male mice were administered TMX and randomized to cold exposure for seven days ( $n = 10$  mice/group). Rectal temperature (**a**), WAT weight (**b**), and thermogenic gene expression (**c**) ( $n = 4$  mice/group) were assessed. **d-f**, Six-month-old Sma-Control and Sma-Pdgfr $\beta$ -KO male mice were administered TMX and randomized to cold exposure for seven days ( $n = 15$  mice/group). Rectal temperature (**d**), WAT weight (**e**), and thermogenic gene expression (**f**) ( $n = 4$  mice/group) were assessed. **g-i**, Twelve-month-old Sma-Control and Sma-Pdgfr $\beta$ -KO male mice were administered TMX and randomized to cold exposure for seven days ( $n = 10$  mice/group). Rectal temperature (**g**), WAT weight (**h**), and thermogenic gene expression (**i**) ( $n = 4$  mice/group) were assessed. **j**, Beige adipocyte quantification within iWAT sections from cold exposed two-, six-, and twelve-month-old Sma-Control and Sma-Pdgfr $\beta$ -KO mice ( $n = 3$  images/mouse; 3 mice/group) (\* $P = <0.001$  mutants compared to age-match controls). **k, l**, BAT weight (**k**) and BAT Ucp1 mRNA expression (**l**) within cold exposed two-, six-, and twelve-month-old Sma-Control and Sma-Pdgfr $\beta$ -KO mice ( $n = 10$  or 15 (**k**) or 4 (**l**) biologically independent mice/group). **m**, Representative images of H&E staining of BAT sections from cold exposed two-, six-, and twelve-month-old Sma-Control and Sma-Pdgfr $\beta$ -KO mice (x20 magnification, scale bars 100  $\mu$ m) (Images representative of 3 independent experiments). Data are presented as mean values  $\pm$  SEM. Data was analyzed by two-tailed Student's  $t$ -test. Source data are provided within the Source Data file.

# Supplementary Figure 4

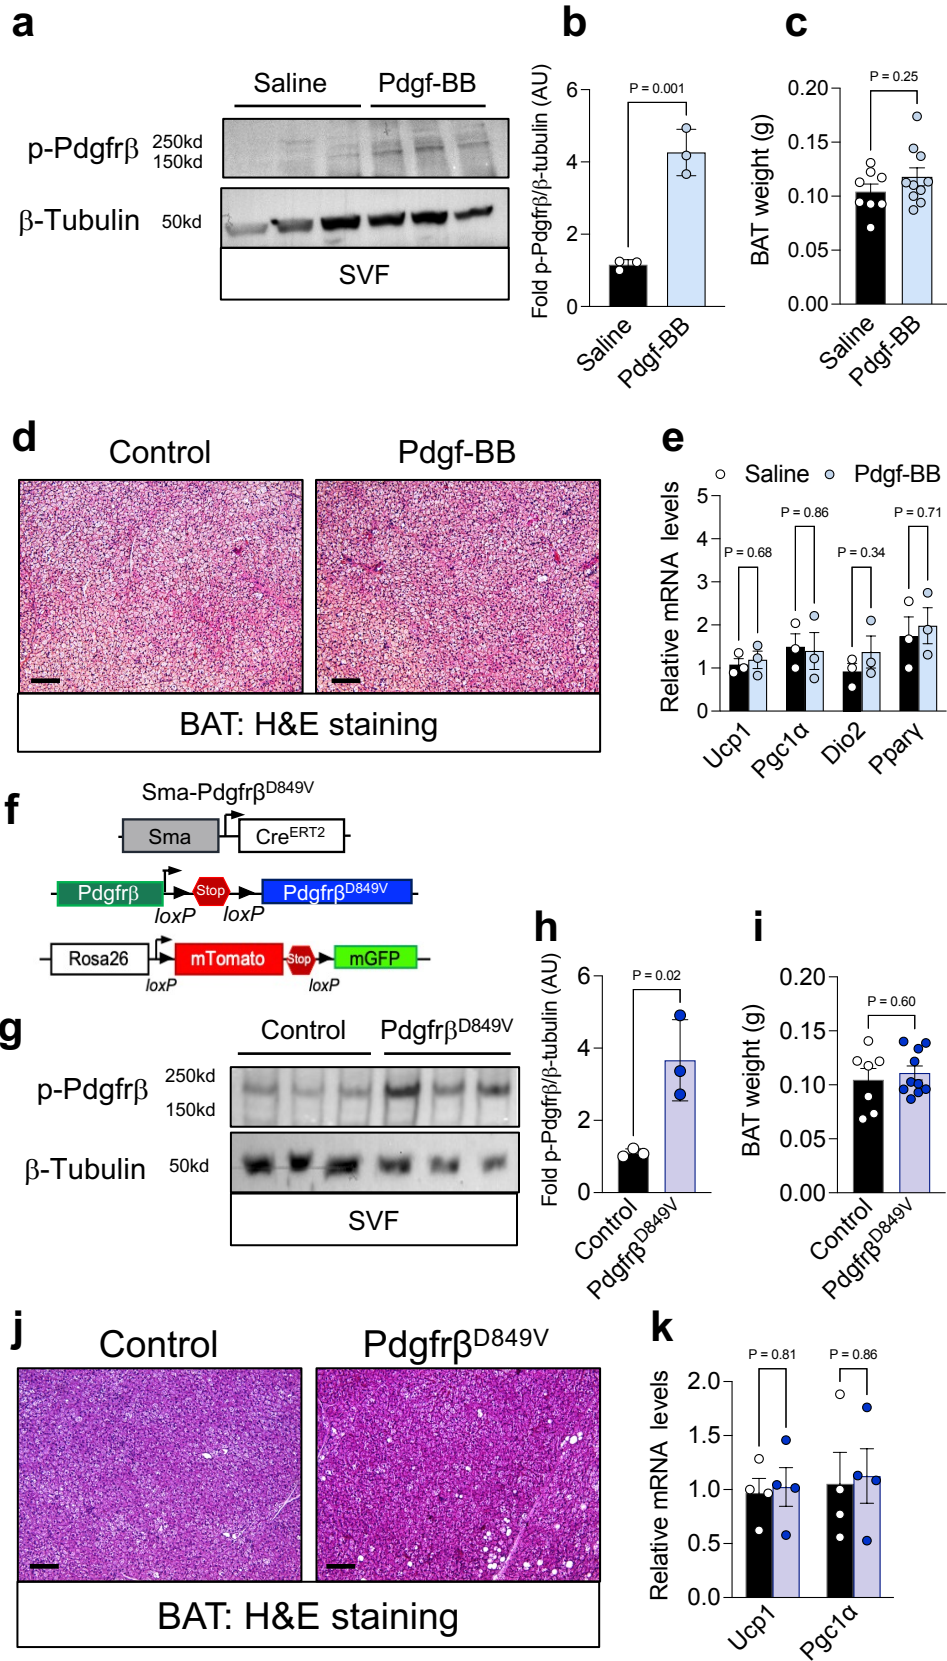

**Supplementary Figure 4: Activating Pdgfr $\beta$  dampens beige fat development** **a**, Two-month-old Sma-Control male mice were administered one dose of Saline (1X PBS 0.1% BSA) or Pdgf-BB (25 ng/mouse) for five consecutive days by IP injection at RT. Subsequently, the SVF was isolated from iWAT depots and immunoblotted against phosphorylated Pdgfr $\beta$  (p-Pdgfr $\beta$ ) and  $\beta$ -tubulin levels ( $n = 3$  mice/group). **b**, Quantification of immunoblot described in (a). **c**, BAT weight from mice described in (a) that were cold exposed for three-days (Vehicle  $n = 8$ ; Pdgf-BB  $n = 10$ ). **d**, Representative images of H&E staining of BAT sections from cold exposed mice described in (c) (x10 magnification, scale bar 100  $\mu$ m). **e**, mRNA levels of denoted thermogenic genes within BAT from cold exposed mice described in (c) ( $n = 3$  mice/group). **f**, Allelic combination used to generate Sma-Pdgfr $\beta^{D849V}$  mice. **g**, The SVF was isolated from iWAT depots from TMX-Induced Sma-Control and Sma-Pdgfr $\beta^{D849V}$  and immunoblotted against phosphorylated Pdgfr $\beta$  (p-Pdgfr $\beta$ ) and  $\beta$ -tubulin levels ( $n = 3$  mice/group). **h**, Quantification of the immunoblot described in (g). **i-k**, Two-month-old TMX-induced Sma-Control and Sma-Pdgfr $\beta^{D849V}$  male mice were cold exposed for seven days (Control  $n = 7$ ; mutant  $n = 10$ ). BAT weight (i), representative histology (j) (x10 magnification, scale bars 100  $\mu$ m), and brown adipocyte gene expression (k) were evaluated. Data are presented as mean values  $\pm$  SEM. Data was analyzed by two-tailed Student's *t*-test. Source data are provided within the Source Data file.

# Supplementary Figure 5

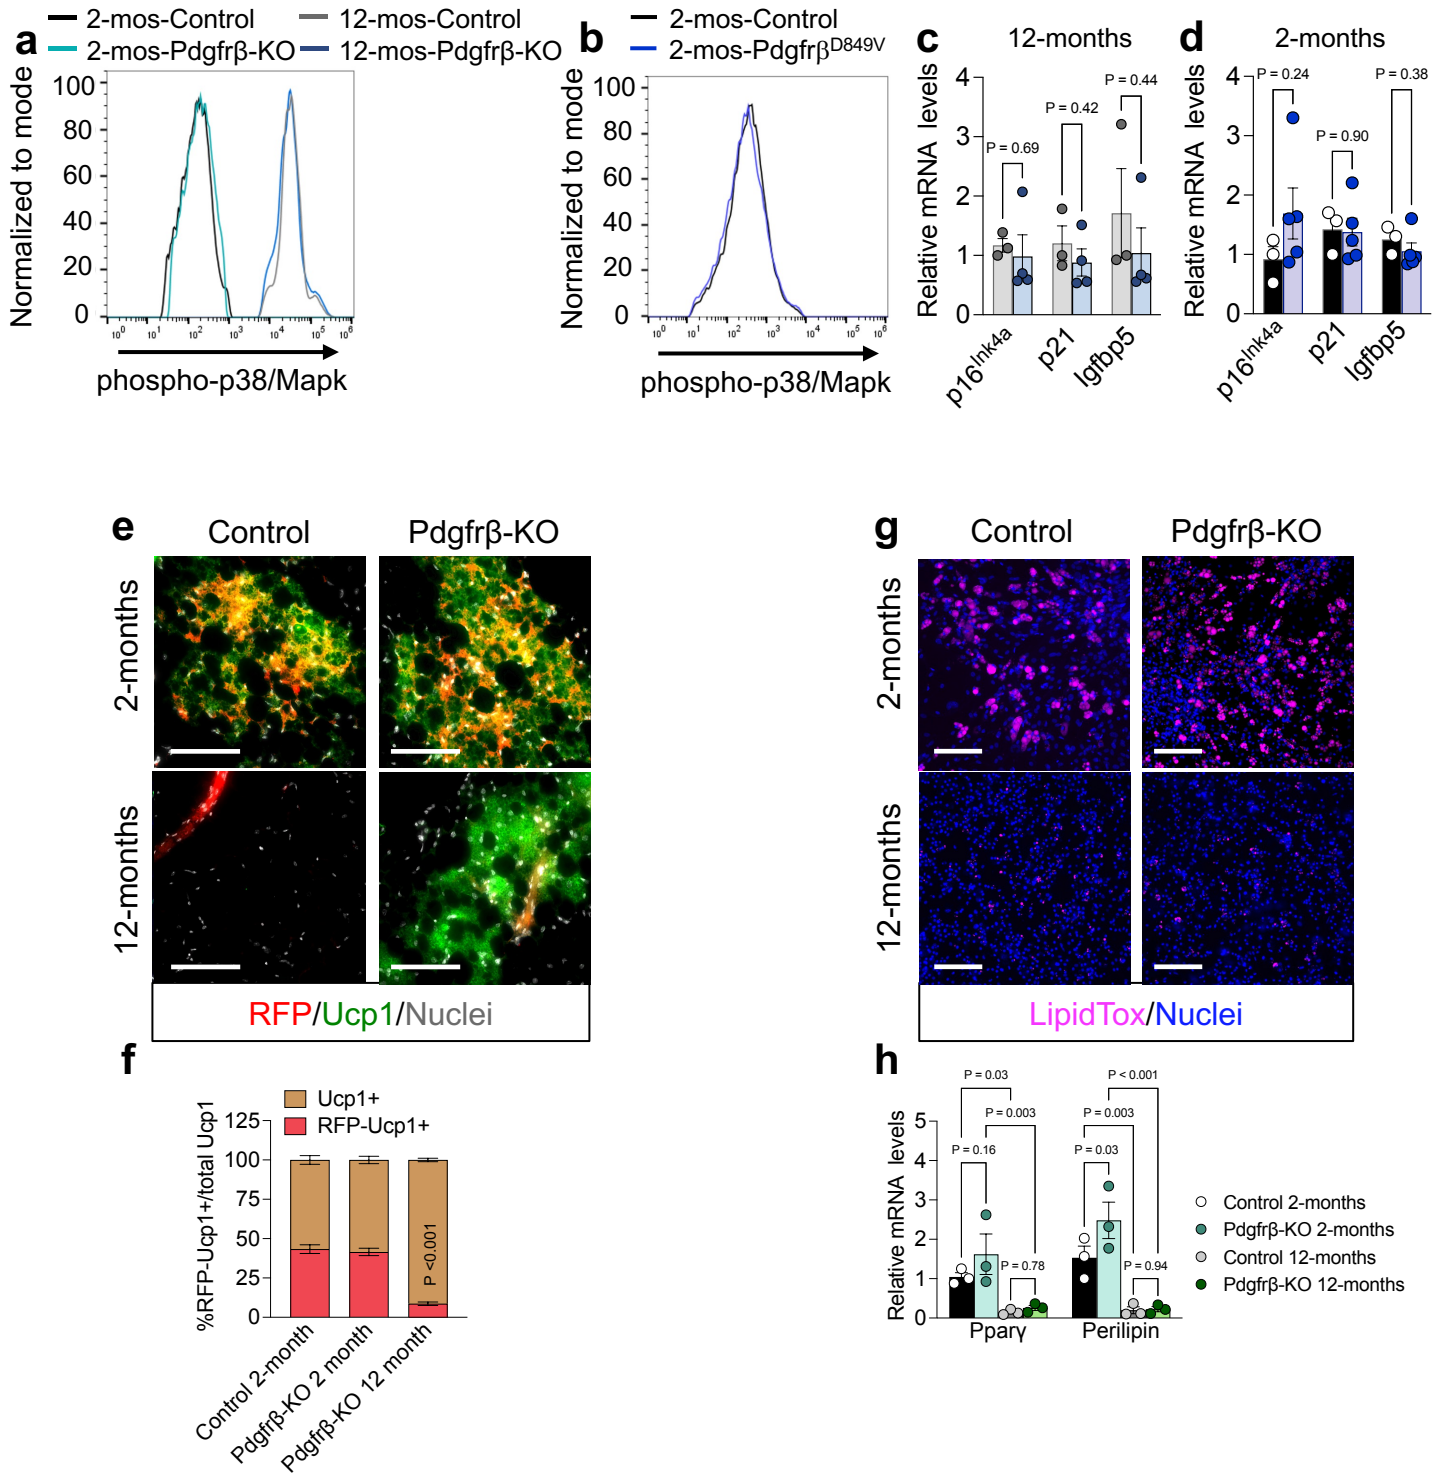

**Supplementary Figure 5: Pdgfr $\beta$  activity does not alter senescence to induce beige fat development.** **a**, Sma-<sup>mGFP+</sup> cells were FACS isolated from two- and twelve-month-old TMX-induced Sma-Control and Sma-Pdgfr $\beta$ -KO mice and examined for phosphorylated p38/Mapk by flow cytometry. **b**, Sma-<sup>mGFP+</sup> cells were FACS isolated from two-month-old TMX-induced Sma-Control and Sma-Pdgfr $\beta$ <sup>D849V</sup> mice and examined for phosphorylated p38/MAPK by flow cytometry. **c**, mRNA levels of denoted senescence inducing genes within iWAT depots from twelve-month-old Sma-Control and Sma-Pdgfr $\beta$ -KO male mice ( $n = 3$  or 4 mice/group). **d**, mRNA levels of denoted senescence inducing genes within iWAT depots from two-month-old Sma-Control and Sma-Pdgfr $\beta$ <sup>D849V</sup> mice (Control  $n = 3$ ; Pdgfr $\beta$ <sup>D849V</sup>  $n = 5$ ). **e**, Representative images of RFP (Sma-driven) and Ucp1 immunostaining and fate mapping analysis of iWAT sections from two- and twelve-month-old TMX-induced Sma-Control (R26<sup>RFP</sup>) and Sma-Pdgfr $\beta$ -KO (R26<sup>RFP</sup>) mice (x40 magnification, scale bars 100  $\mu$ m). **f**, Quantification of RFP-Ucp1 overlap within sections described in **(e)** ( $n = 3$  biologically independent mice/group with 3 images per mouse quantified). **g**, Representative images of lipid staining (LipidTox) of in vitro derived beige adipocytes from in vivo TMX-induced two- and twelve-month-old Sma-Control and Sma-Pdgfr $\beta$ -KO mice (x20 magnification, scale bars 100  $\mu$ m). **h**, mRNA expression of adipocyte markers from cultures described in **(i)** ( $n = 3$  mice/group). Data are presented as mean values  $\pm$  SEM. Data was analyzed by two-tailed Student's t-test or two-way ANOVA multiple comparison. Source data are provided within the Source Data file.



# Supplementary Figure 6

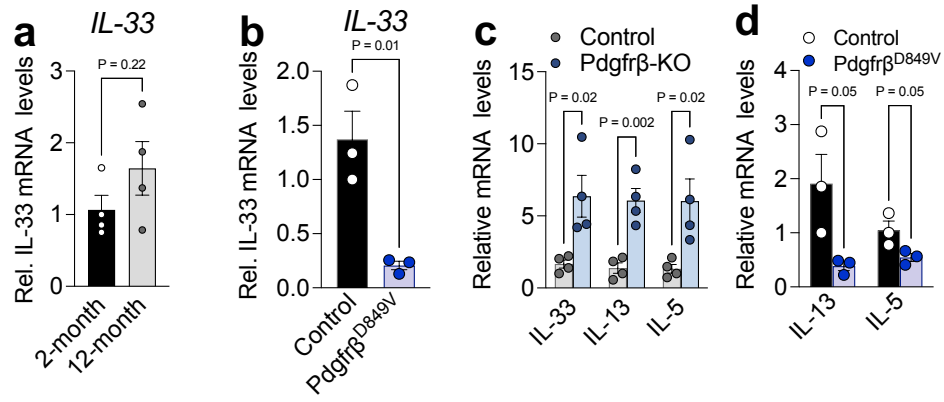

**Supplementary Figure 6: Pdgfr $\beta$  regulates IL-33 to promote beige fat development** **a**, mRNA expression of IL-33 within iWAT depots of two- and twelve-month-old Sma-Control mice maintained at RT (n = 4 biologically independent mice/group examined over 2 experiments). **b**, mRNA expression of IL-33 within iWAT depots of TMX-induced two-month-old Sma-Control and Sma-Pdgfr $\beta^{D849V}$  mice maintained at RT (n = 3 biologically independent mice/group examined over 2 experiments). **c**, mRNA expression levels of denoted type 2 cytokine immune markers from twelve-month-old Sma-Control and Sma-Pdgfr $\beta$ -KO mice (n = 4 biologically independent mice/group examined over 2 experiments). **d**, mRNA expression levels of denoted type 2 cytokine immune markers from two-month-old Sma-Control and Sma-Pdgfr $\beta^{D849V}$  mice cold exposed for two days (n = 3 biologically independent mice/group examined over 2 experiments). Data are presented as mean values  $\pm$  SEM. Data was analyzed by two-tailed Student's *t*-test. Source data are provided within the Source Data file.

# Supplementary Figure 7

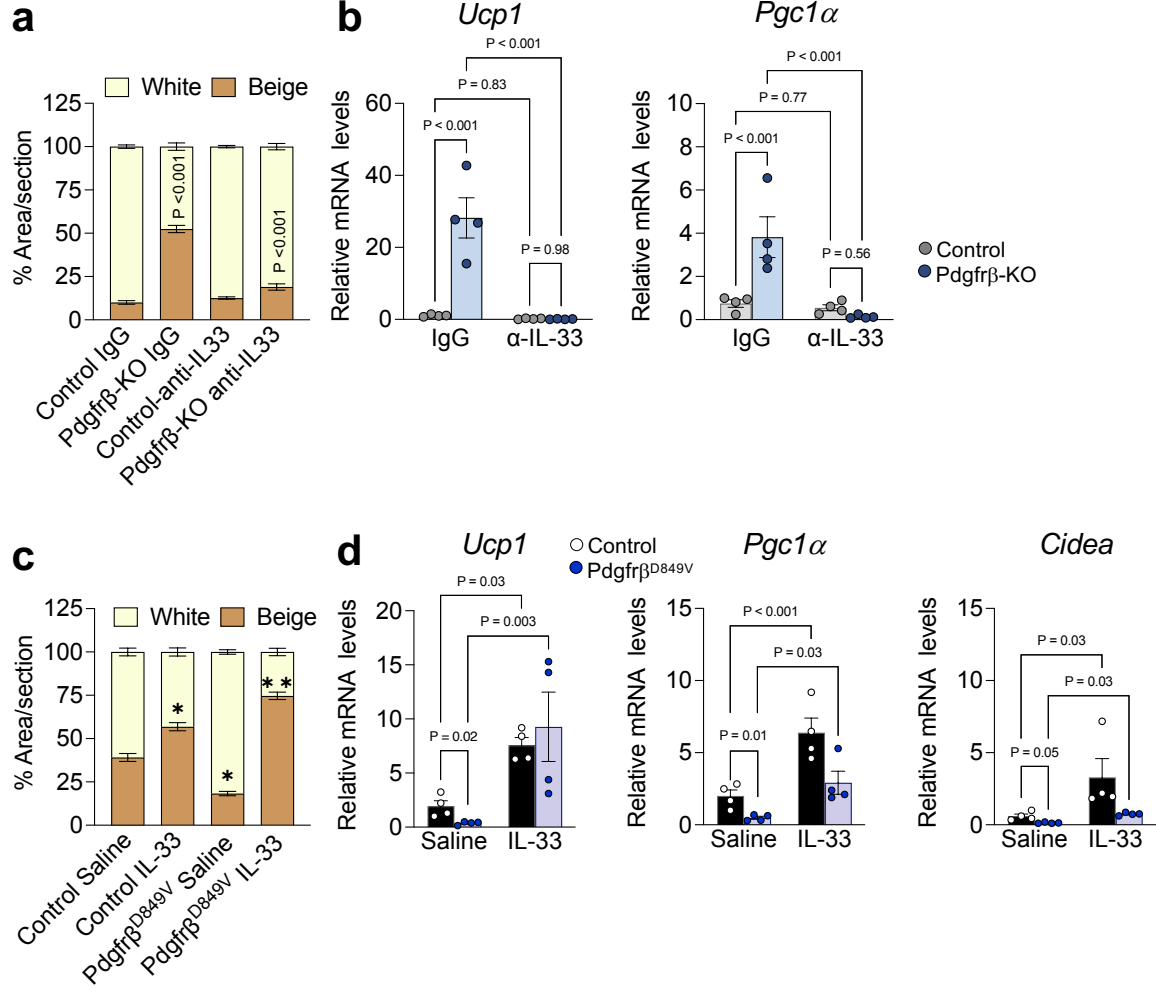

**Supplementary Figure 7: IL-33 mediates Pdgfr $\beta$ -KO induced beige fat formation.** **a**, Quantification of beige and white adipocyte area per section ( $n=3$  images/mouse; 3 mice/group) from Ucp1 immunostained images (Fig. 5d) from twelve-month-old Sma-Control and Sma-Pdgfr $\beta$ -KO mice treated with IgG (1  $\mu$ g/mouse) or anti-IL-33 (1  $\mu$ g/mouse) antibodies. **b**, mRNA expression level of Ucp1 and Pgc1a from mice described in (a) ( $n=4$  mice/group). **c**, Quantification of beige and white adipocyte area per section ( $n=3$  images/mouse; 3 mice/group) from Ucp1 immunostained images (Fig. 5h) from two-month-old TMX-induced Sma-Control and Sma-Pdgfr $\beta^{D849V}$  were administered one dose of vehicle (0.1%BSA in 1xPBS) or recombinant murine IL-33 (12  $\mu$ g/Kg) for five consecutive days and subsequently cold exposed for seven days (\*P = < 0.001 compared to saline beige area; \*\*P = < 0.001 Sma-Pdgfr $\beta^{D849V}$  compared to Sma-Pdgfr $\beta^{D849V}$  IL-33 treated beige area) **d**, mRNA expression level of Ucp1, Pgc1a, and Cidea from mice described in (c) ( $n=4$  mice/group). Data are presented as mean values  $\pm$  SEM. Data was analyzed by two-tailed Student's *t*-test or two-way ANOVA multiple comparison. Source data are provided within the Source Data file.

# Supplementary Figure 8

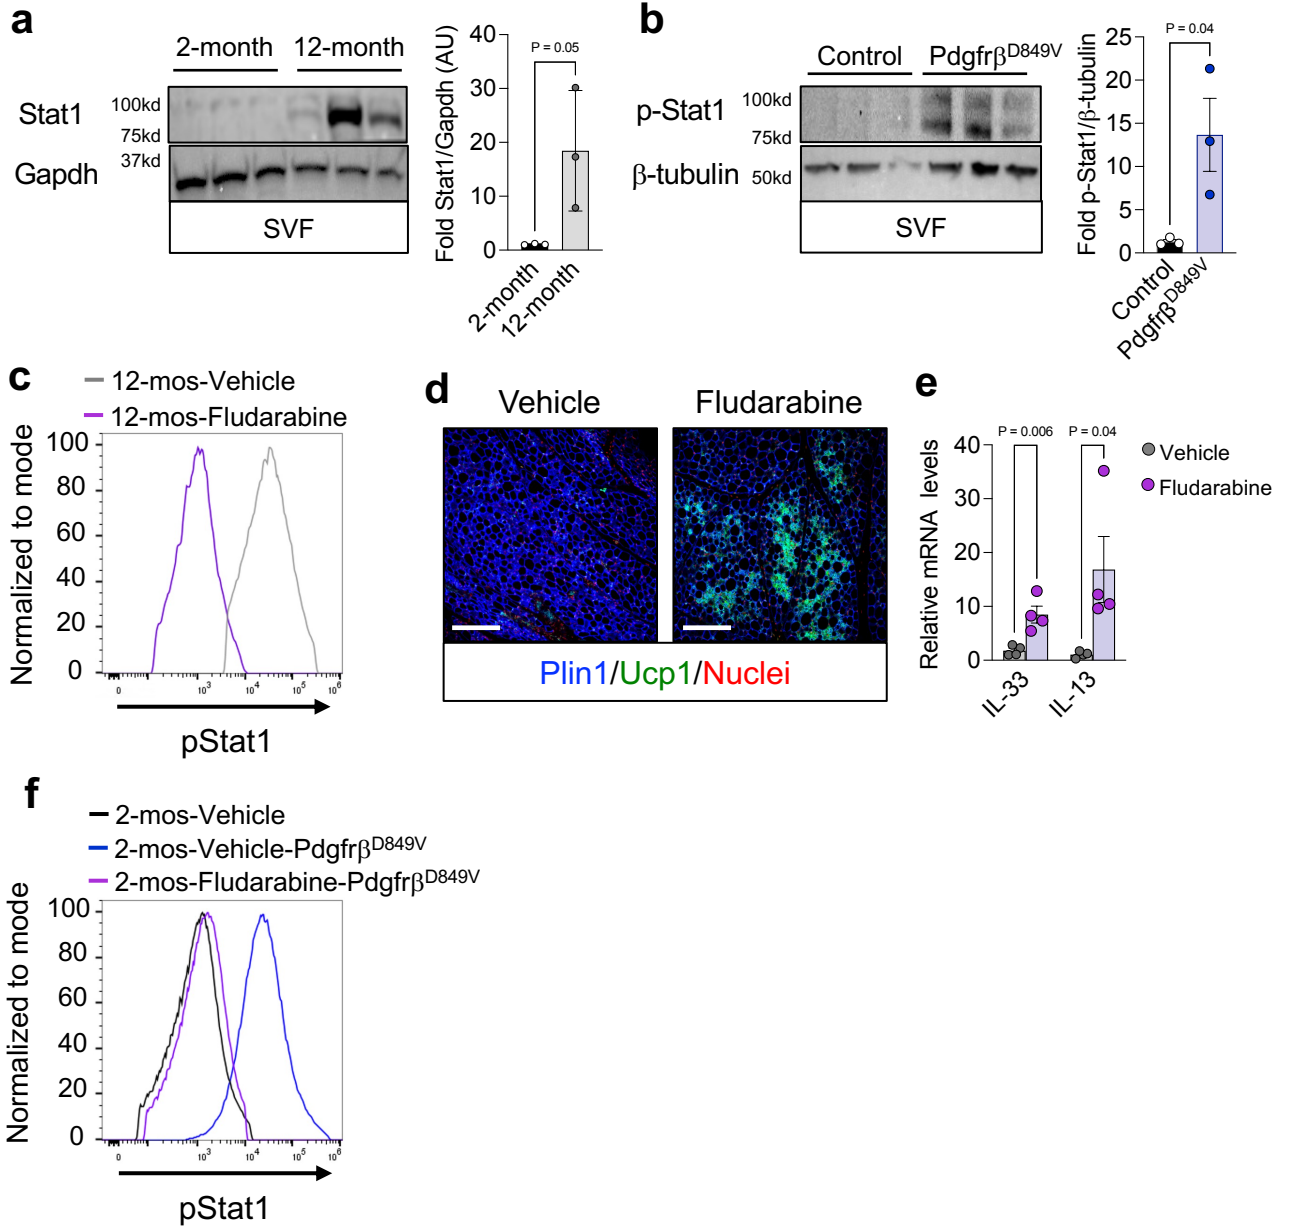

**Supplementary Figure 8: Fludarabine restores beige adipogenic potential in ageing and Sma-**

**Pdgfr $\beta^{D849V}$  mice.** **a**, The SVF was isolated from iWAT depots from two- and twelve-month-old male mice and immunoblotted against total Stat1 and Gapdh was used as a loading control ( $n= 3$  mice/group). Right: quantification of immunoblot. **b**, The SVF was isolated from iWAT depots from TMX-Induced Sma-Control and Sma-Pdgfr $\beta^{D849V}$  and immunoblotted against phosphorylated Stat1 (p- Stat1) and  $\beta$ -tubulin levels ( $n= 3$  mice/group). Right: quantification of immunoblot. **c**, Representative flow cytometric histogram of phosphorylated Stat1 status within FACS isolated Sma- $mGFP^+$  cells from aged Sma-Control mice administered one dose of vehicle or fludarabine (3 mg/kg) for five consecutive days maintained at RT. **d**, Twelve-month-old TMX-induced Sma-Control mice were administered one dose of vehicle (5% DMSO) or fludarabine (3 mg/Kg) for five consecutive days and subsequently cold challenged for seven days. Representative images of Plin1 (blue) and Ucp1 (green) immunostaining of dorsolumbar iWAT sections (x20 magnification, scale bars 100  $\mu$ m) (Images representative of 2 independent experiments). **e**, mRNA levels of IL-33 and IL-13 from mice described in (**d**) but after two of cold exposure ( $n = 4$  biologically independent mice/group examined over 2 experiments). **f**, Representative flow cytometric histogram of phosphorylated Stat1 status within FACS isolated Sma- $mGFP^+$  cells from two-month-old Sma-Control and Sma-Pdgfr $\beta^{D849V}$  male mice administered one dose of vehicle or fludarabine (3 mg/kg) for five consecutive days maintained at RT. Western blots were performed using three independent mice. Data are presented as mean values  $\pm$  SEM. Data was analyzed by two-tailed Student's *t*-test. Source data are provided within the Source Data file.



12-month-old Dataset

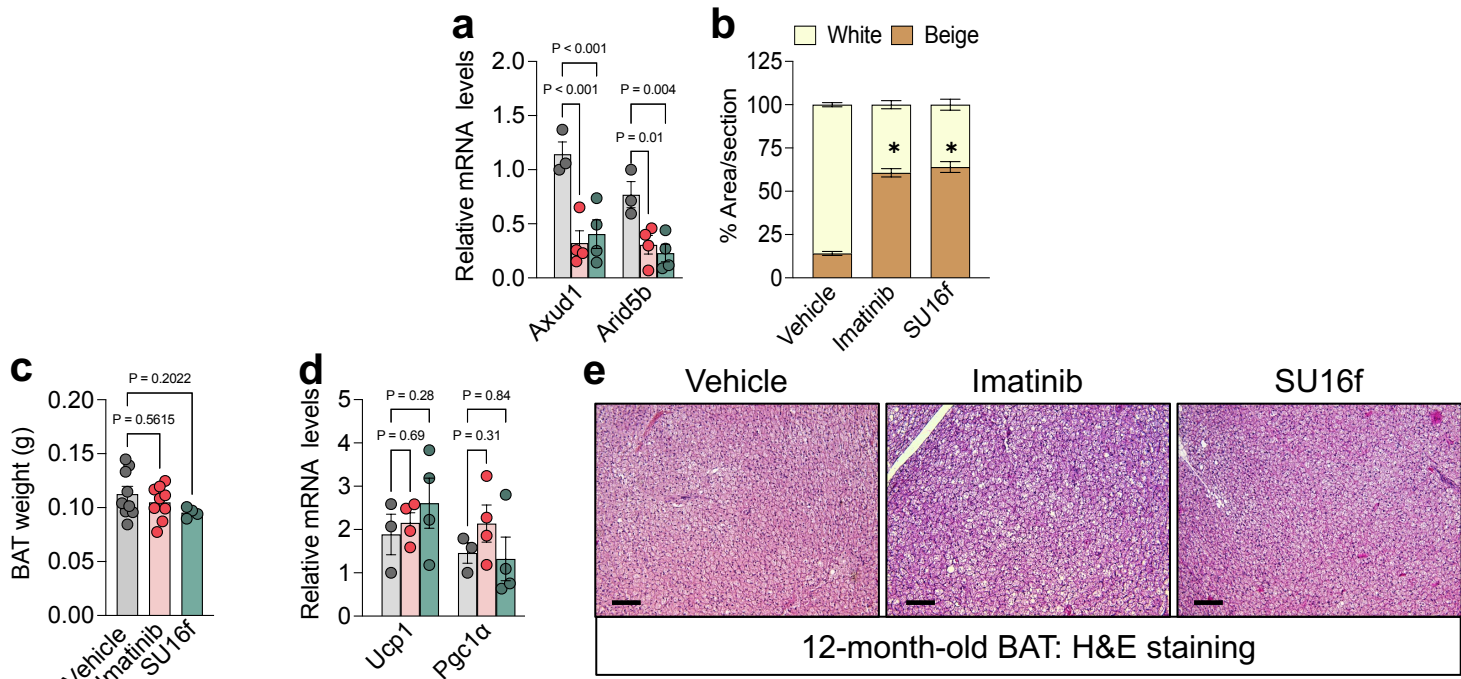

2-month-old Dataset

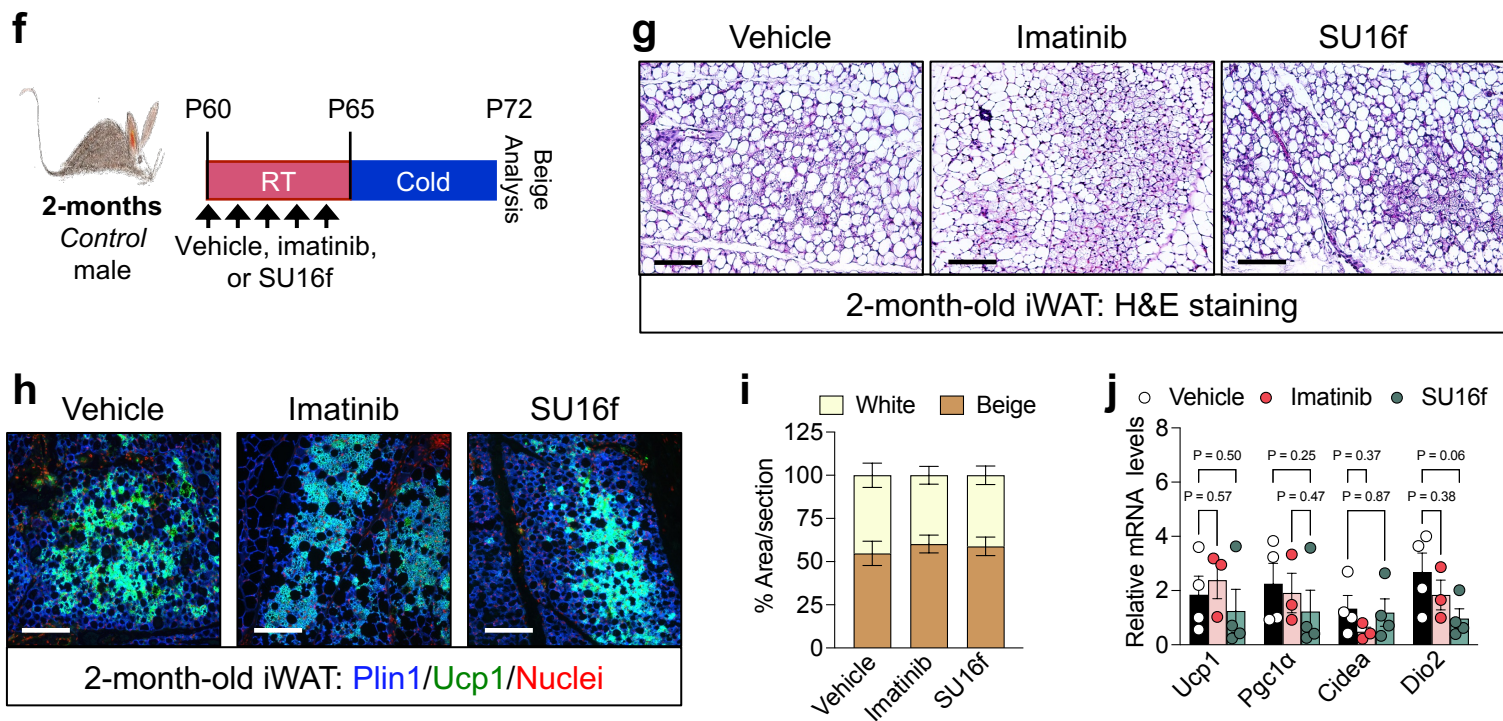

**Supplementary Figure 9: Blocking Pdgfr $\beta$  restores beige adipogenic potential in ageing mice. a,**

Twelve-month-old male mice were administered one dose of vehicle (5% DMSO), imatinib (5 mg/Kg), or SU16f (2 mg/Kg) for five consecutive days and mRNA levels of Pdgfr $\beta$  genes in iWAT were assessed ( $n= 3$  or 4 mice/group). **b,** Quantification of beige and white adipocyte area per section ( $n=3$  images/mouse; 3 mice/group) from immunostained images in Fig. 7d (\* $P = <0.001$  treated compared to vehicle). **c-e,** Mice described in (a) were cold challenged for seven days and BAT weight (**c**) (SU16f  $n = 4$ ; Vehicle or imatinib  $n = 9$  mice/group), BAT gene expression (**d**) ( $n= 3$  or 4 mice/group) , and morphology (representative images of H&E staining x10 magnification, scale bar 100  $\mu\text{m}$ ) (**e**) was assessed. **f,** Experimental schema: two-month-old Sma-Control mice administered vehicle (5% DMSO), imatinib (5 mg/Kg), or SU16f (2 mg/Kg) for five consecutive days; subsequently mice were cold challenged for seven days ( $n = 4-13$  mice/group). **g,** Representative images of H&E staining of dorsolumbar iWAT sections from mice described in (f) (x20 magnification, scale bars 100  $\mu\text{m}$ ). **h,** Representative images of Plin1 (blue) and Ucp1 (green) immunostaining of dorsolumbar iWAT sections from mice described (f) (x20 magnification, scale bars 100  $\mu\text{m}$ ). **i,** Quantification of beige and white adipocyte area per section ( $n = 3$  images/mouse; 3 mice/group) from immunostained images in (h). **j,** mRNA levels of denoted thermogenic gene expression within iWAT depots from mice described in (f) ( $n = 3$  or 4 biologically independent mice/group examined over 2 experiments). Data are presented as mean values  $\pm$  SEM. Data was analyzed by two-tailed Student's  $t$ -test. Source data are provided within the Source Data file.

**Model**

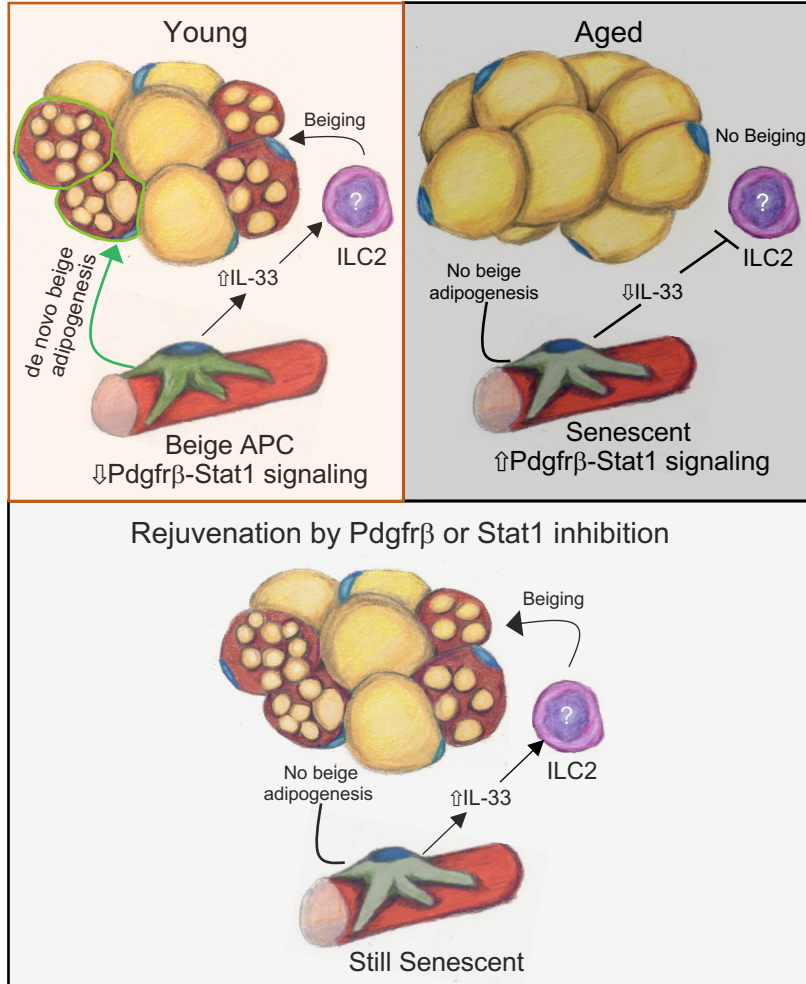

**Supplementary Figure 10: Proposed Model.** In the juvenile state, cold temperatures induce Sma marked beige APCs to generate beige adipocytes. Additionally, beige APCs further communicate with WAT-resident immunological niche cells to foster a beige adipogenic niche via IL-33 secretion. In the adult state, beige APCs appear to become senescent and are unable to generate beige adipocytes in response to cold temperature exposure. Accompanying cellular senescence, beige APCs acquire hyperactivated Pdgfr $\beta$  signaling which suppresses IL-33 availability via Stat1 phosphorylation. The concomitant loss of IL-33 blunts the immunological niche such as ILC2 or Th2-cells, dampening beige adipogenic responses. However, pharmacological blocking Pdgfr $\beta$  signaling restores beige adipogenic potential by elevating IL-33 gene suppression, stimulating the beige adipocyte development.

**Supplementary Table 1**

| <b>Gene</b>      | <b>Forward</b>             | <b>Reverse</b>          |
|------------------|----------------------------|-------------------------|
| <i>Arid5b</i>    | GCTGATAACTTTACCGTCACAGT    | GTGATGAGTTCGCGCCAAATC   |
| <i>Axud1</i>     | GTCTGTCCTCGGCTGTTGGAACC    | CCACCTCAGCATCTCCAGCTTC  |
| <i>Cidea</i>     | TCTGCAATCCCATGAATGTC       | CAGTGATTTAAGAGACGCGG    |
| <i>Dio2</i>      | ACACTGGAATTGGGAGCATC       | ATGCTGACCTCAGAAGGGCT    |
| <i>Elovl3</i>    | TTCTCACGCGGGTTAAAAATGG     | GAGCAACAGATAGACGACCAC   |
| <i>Fasn</i>      | GGAGGTGGTGATAGCCGGTAT      | TGGGTAATCCATAGAGCCCAG   |
| <i>Igfbp5</i>    | CGCGGGGTTTGCCTCAACGA       | CTGCGGCAGGGGCCTTGTTT    |
| <i>IL-5</i>      | CTCTGTTGACAAGCAATGAGACG    | TCTTCAGTATGTCTAGCCCCTG  |
| <i>IL-13</i>     | CCTGGCTCTTGCTTGCCTT        | GGTCTTGTGTGATGTTGCTCA   |
| <i>IL-33</i>     | TCCAACCTCCAAGATTTCCCCG     | CATGCAGTAGACATGGCAGAA   |
| <i>p16INK4a</i>  | CGCAGGTTCTTGGTCACTGT       | TGTTCACGAAAGCCAGAGCG    |
| <i>p21</i>       | CGAGAACGGTGGAACCTTTGAC     | CAGGGCTCAGGTAGACCTTG    |
| <i>Perilipin</i> | GGGACCTGTGAGTGCTTCC        | GTATTGAAGAGCCGGGATCTTTT |
| <i>hPdgfrb</i>   | AGCACCTTCGTTCTGACCTG       | TATTCTCCCGTGTCTAGCCCA   |
| <i>mPdgfrb</i>   | AGGGGGCGTGATGACTAGG        | TTCCAGGAGTGATAACCAGCTT  |
| <i>Pgc1α</i>     | TATGGAGTGACATAGAGTGTGCT    | CCACTTCAATCCACCCAGAAAG  |
| <i>Pparγ</i>     | TCGCTGATGCACTGCCTATG       | GAGAGGTCCACAGAGCTGATT   |
| <i>Prdm16</i>    | ACACGCCAGTTCTCCAACCTGT     | TGCTTGTTGAGGGAGGAGGTA   |
| <i>Ucp1</i>      | CGACTCAGTCCAAGAGTACTTCTCTT | GCCGGCTGAGATCTTGTTTC    |
| <i>Rn18S</i>     | GTAACCCGTTGAACCCCAT        | CCATCCAATCGGTAGTAGCG    |

**Supplementary Table 1.** Primer sequences for qPCR gene expression analysis.
