# Supplementary material for: Age-dependent Pdgfrβ signaling drives adipocyte progenitor dysfunction to alter the beige adipogenic niche in male mice
Source: PubMed Central journal article supplement (PMC10066302; doi:10.1038/s41467-023-37386-z), 2023-03-31
Supplement: 41467_2023_37386_MOESM3_ESM.pdf [file 41467_2023_37386_MOESM3_ESM.pdf]

## **Description of Additional Supplementary Files**

**Supplementary Data 1:** Bulk mRNA-seq analysis of 2 vs. 12-month-old SVF

**Supplementary Data 2:** GSEA Results: Gene sets enriched in 12 month old SVF

**Supplementary Data 3:** Bulk mRNA-seq analysis of 12 month cont vs. 12 month old PB KO SVF
